# Supplementary material
Source: publisher figshare collection journal article supplement (https://acs.figshare.com/ndownloader/files/4159990)
Supplement: Supplementary file 1 [file 4159990]

Supporting Information for

**Mercury Exposure May Suppress Baseline Corticosterone Levels in Juvenile Birds**

by Garth Herring, Joshua T. Ackerman, and Mark P. Herzog

Total pages (including cover): 2

Number of Figures: 1

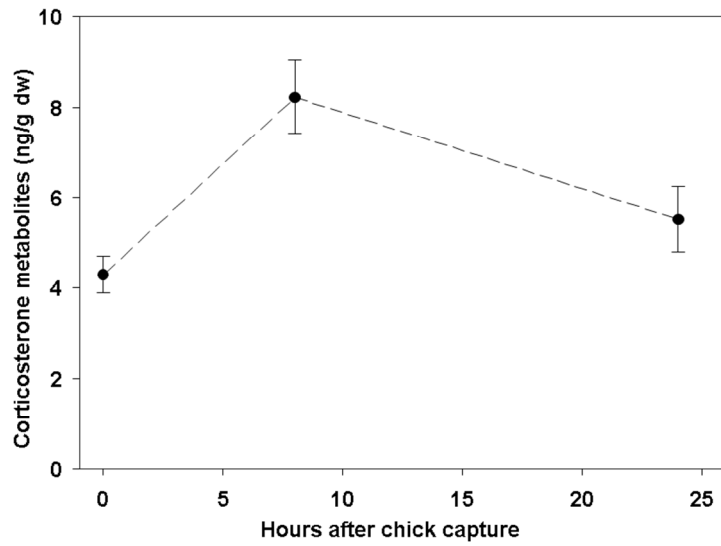

**Figure S1.** Baseline (0 hours) and stress-induced (>0 hours) fecal corticosterone metabolite concentrations (ng/g dw) of Forster's tern chicks in San Francisco Bay, California. Chicks were stressed by capturing and holding them for 1 hr, then releasing and re-capturing them at 8 and 24 hrs after their initial capture.
